# Supplementary material for: An international study of how laboratories handle and evaluate patient samples after detecting an unexpected APTT prolongation
Source: publisher site journal article supplement (doi:10.1515/cclm-2014-1183), 2015-01-01
Supplement: Supplementary file 2 [file Supplemental_data_Table_2_uAPTT_Ajzner_et_al_CCLM.pdf › Supplemental_data_Table_2_uAPTT_Ajzner_et_al_CCLM.pdf]

| Classifications used in the text                                                                                                                                                 |                                                                                                                                       | Reference to survey's questions and answering option(s)                                                                                    |
|----------------------------------------------------------------------------------------------------------------------------------------------------------------------------------|---------------------------------------------------------------------------------------------------------------------------------------|--------------------------------------------------------------------------------------------------------------------------------------------|
| Nationality                                                                                                                                                                      |                                                                                                                                       | Q2                                                                                                                                         |
| Laboratory type                                                                                                                                                                  | Special coagulation laboratory                                                                                                        | Q22 option 3 (+any combination containing 3)                                                                                               |
|                                                                                                                                                                                  | Nonspecial coagulation laboratory in primary healthcare                                                                               | Q22 option 4 (+any combination containing 4)                                                                                               |
|                                                                                                                                                                                  | Nonspecial coagulation laboratory on secondary or tertiary care                                                                       | Q22 option 1 (only)                                                                                                                        |
| Qualification of respondents                                                                                                                                                     | Medical doctors and laboratory scientists with specialization in clinical chemistry or laboratory medicine                            | Q21 option 1 (in any combination containing 1)                                                                                             |
|                                                                                                                                                                                  | Medical doctors and laboratory scientists without specialization                                                                      | Q21 only option 3 (no combinations) and Q21 only option 2 (no combinations)                                                                |
|                                                                                                                                                                                  | Medical doctors without specialization                                                                                                | Q21 only option 3 (no combinations)                                                                                                        |
|                                                                                                                                                                                  | Laboratory technologists                                                                                                              | Q21 option 4 (in any combination containing 4)                                                                                             |
| Daily APTT requests/workload                                                                                                                                                     |                                                                                                                                       | Q23 fill in                                                                                                                                |
| Postanalytical activity: Never do                                                                                                                                                | Exclusion heparin presence                                                                                                            | Q4 option 7                                                                                                                                |
|                                                                                                                                                                                  | Mixing studies (nonmixers)                                                                                                            | Q5 option 4                                                                                                                                |
|                                                                                                                                                                                  | Do (or send for) special investigations                                                                                               | Q7 option 1 or Q18 option 1                                                                                                                |
|                                                                                                                                                                                  | Written comment or interpretation                                                                                                     | Q6 option 1 or Q13 option 2                                                                                                                |
| Postanalytical activity: Practice “exclusively clinically driven” (e.g., performed at the laboratory using exclusively clinical information and no reflex or reflective testing) | Exclude heparin only by clinical information                                                                                          | Q4 option 1 or 2                                                                                                                           |
|                                                                                                                                                                                  | Mix only upon physician's request                                                                                                     | Q5 option 3                                                                                                                                |
|                                                                                                                                                                                  | Do or send for special investigations only upon physician's request                                                                   | Q7 option 2 or Q18 option 2 or Q7 option 5 or Q18 option 6                                                                                 |
|                                                                                                                                                                                  |                                                                                                                                       |                                                                                                                                            |
| Postanalytical activity: Practice “laboratory driven” (e.g., using reflex or reflective testing)                                                                                 | Exclude heparin by laboratory method                                                                                                  | Q4 option 3/4/5/6 and or Q4 option 1/2 and 3/4/5/6                                                                                         |
|                                                                                                                                                                                  | Mix laboratory initiated                                                                                                              | Q5 option 1 or 2                                                                                                                           |
|                                                                                                                                                                                  | Do or send for special investigations laboratory initiated                                                                            | Q18 option 5 or 3+4+5 or Q18 3+4 (only) or Q7 option 3 or 4 or 3+4 or Q18 option 3 only or option 4 only never include 3+4 together        |
|                                                                                                                                                                                  | Provide written comment or interpretation                                                                                             | Q6 option 2 or Q13 option 1 v 3                                                                                                            |
| Methodologies of mixing studies                                                                                                                                                  | Use only one APTT reagent                                                                                                             | Q25 option 1                                                                                                                               |
|                                                                                                                                                                                  | Unaware of the sensitivity of the only used /1st APTT reagent                                                                         | Q27 option 4                                                                                                                               |
|                                                                                                                                                                                  | Unaware of the sensitivity of the 2nd used APTT reagent                                                                               | Q28 option 4                                                                                                                               |
|                                                                                                                                                                                  | Source of normal plasma in mixing studies is a single donor                                                                           | Q8 option 6                                                                                                                                |
|                                                                                                                                                                                  | Normal plasma used in mixing is buffered                                                                                              | Q9 option 1                                                                                                                                |
|                                                                                                                                                                                  | Unaware if normal plasma is mixing is buffered                                                                                        | Q9 option 3                                                                                                                                |
|                                                                                                                                                                                  | 1:1 ratio is used in mixing studies                                                                                                   | Q10 option 1                                                                                                                               |
|                                                                                                                                                                                  | Incubation is used in mixing studies                                                                                                  | Q11 any options but 1 and Q12 any options but 5                                                                                            |
| Shortcomings in postanalytical actions                                                                                                                                           | Failure to exclude unfractionated heparin presence                                                                                    | Q4 option 7+ Q4 option 1 or 2                                                                                                              |
|                                                                                                                                                                                  | Failure in performing mixing studies                                                                                                  | Q5 option 4                                                                                                                                |
| Shortcomings in mixing methodologies                                                                                                                                             | Sensitivity of the first APTT reagent is unknown                                                                                      | Q27 option 4                                                                                                                               |
|                                                                                                                                                                                  | Sensitivity of the second APTT reagent is unknown                                                                                     | Q28 option 4                                                                                                                               |
|                                                                                                                                                                                  | Single donor's plasma used in mixing studies                                                                                          | Q8 option 6                                                                                                                                |
|                                                                                                                                                                                  | No incubation in mixing studies                                                                                                       | Q11 option 1 and Q12 option 5                                                                                                              |
| Interpretations of mixing studies                                                                                                                                                | “Fully correct” (i.e., good interpretation of the absence or presence of an inhibitor in all three case scenarios)                    | Q15: option 2 and or 3; and Q16: option 1; and Q17: option 2 and or 3                                                                      |
|                                                                                                                                                                                  | “Clinically misleading” (i.e., wrong diagnosis of the absence or presence of an inhibitor in one or more of the three case scenarios) | Q15: option 1 in any combinations or Q16: option 2 or 3 or 2 and 3/or Q17: option 1 in any combinations                                    |
|                                                                                                                                                                                  | “Unresponsive” (i.e., either the option “I do not know” was selected or no answer was given for all three case scenarios)             | Q15 and Q16 and Q17: option 4 or skip answering                                                                                            |
|                                                                                                                                                                                  | “Other” (i.e., responses on the case scenarios not included in the above-three categories)                                            | Other combinations of responses on Q15, 16, 17 but above-three categories (e.g., good interpretation on Q15 and “I do not know” on Q16–17) |

**Supplemental data, Table 2** References of classifications used in the text (Q1–Q27: numbers of questions in the questionnaire)
